# Supplementary material
Source: PubMed Central journal article supplement (PMC5199680)
Supplement: NIHMS791557-supplement-01.pdf [file NIHMS791557-supplement-01.pdf]

## Supplementary Methods

### Cytospin and cell staining

Cells were sorted based on their surface marker expression, cytospun in PBS at 1000 rpm onto glass slides and stained with Hema 3 stain set (Fisher diagnostics) to identify cellular morphology.<sup>1</sup>

### Ly6C<sup>hi</sup> monocyte stimulation

Sorted Ly6C<sup>hi</sup> monocytes from WT and *Nlrp6*<sup>-/-</sup> mice were cultured in complete RPMI with 10% FBS, penicillin/streptomycin and glutamine and stimulated with 20 $\mu$ M rosiglitazone (Cayman Chemicals). After 24-hour incubation at 37°C, supernatant was collected and cytokines measured by ELISA.

### Gene Chip analysis

LP cells were isolated from WT or *Nlrp6*<sup>-/-</sup> mice at day 10 of AOM/2%DSS. Ly6C<sup>hi</sup> monocytes were sorted on a FACS ArialIII (University of Michigan). RNA from sorted cells was extracted using the RNeasy Micro Kit (Qiagen), and contaminated DNA was removed using a DNA-free kit (Ambion). cDNA was prepared from 10 ng total RNA using the NuGen WT-Pico V2 kit (Ovation PicoSL WTA System V2 P/N 3312). Biotinylated single-stranded cDNA was then prepared from 3 $\mu$ g cDNA (Encore Biotin Module; catalog nos. 4200-12, 4200-60, and 4200-A01). Single-stranded cDNA was then fragmented, and 3.7  $\mu$ g cDNA was hybridized for 20 h at 48 °C on Mouse Gene ST 2.1 strip arrays using the Affymetrix Gene Atlas System (software version 1.0.4.267). Arrays were scanned using the same system. Expression values were calculated using a robust multiarray average (RMA). RMA was calculated using the oligo package of bioconductor in R (Version 2.15.1; [www.R-project.org](http://www.R-project.org)). Ratios were generated using normalized raw expression values and then log<sub>2</sub> transformed. Functional analyses of gene expression

changes were performed using Ingenuity Pathways Analysis (IPA) 8.0 (Ingenuity Systems; <http://www.ingenuity.com>). The analysis considered all genes from the data set that were associated with biologic functions in the Ingenuity Pathways Knowledge Base.<sup>2</sup> Heat map of hierarchical clustering of the genes from cytokine/chemokine pathways, based on IPA was generated. The microarray data are available in the Gene Expression Omnibus (GEO) database (<http://www.ncbi.nlm.nih.gov/gds>) under the accession number GSE79631.

### Supplementary Figure Legends

**Supplementary Figure 1. NLRP6 is induced in lamina propria Ly6C<sup>hi</sup> monocytes during DSS induced inflammation.** WT and *Nlrp6*<sup>-/-</sup> mice were subjected to 3.5% DSS in drinking water for 5 days. On day 5 mice were sacrificed. NLRP6 expression was measured in (a) total LP cells and (b) CD3<sup>+</sup>B220<sup>-</sup>CD11b<sup>-</sup> T cells, CD3<sup>-</sup>B220<sup>+</sup>CD11b<sup>-</sup> B cells, CD3<sup>-</sup>CD11b<sup>+</sup>Ly6C<sup>hi</sup>Ly6G<sup>-</sup> monocytes and CD3<sup>-</sup>CD11b<sup>+</sup>Ly6C<sup>int</sup>Ly6G<sup>+</sup> neutrophils within the LP by qPCR. Data are presented as mean ± SEM; n=5/genotype; statistical analysis was completed using Mann-Whitney non-parametric U test, p<0.05.

**Supplementary Figure 2. Ly6C<sup>hi</sup> inflammatory monocytes are CCR2<sup>+</sup>, which is required for protection against DSS-induced mortality in *Nlrp6*<sup>-/-</sup> mice.** (a) Adoptive transfer of GFP<sup>+</sup> Ly6C<sup>hi</sup> monocytes at day 3.5 of 3.5% DSS results in infiltration of donor cells into the LP of recipient *Nlrp6*<sup>-/-</sup> mice. (b) Representative plots of Ly6C versus Ly6G staining of CD3<sup>-</sup> CD11b<sup>+</sup> LP cells (left) and percent CCR2<sup>+</sup> cells within Ly6C<sup>hi</sup> monocytes in the LP of DSS-treated WT and *Nlrp6*<sup>-/-</sup> mice (right). Staining for CCR2 in splenocytes isolated from *Ccr2*<sup>-/-</sup> mice as a negative control (far right). (c) Percent weight change of WT, *Nlrp6*<sup>-/-</sup>, and *Nlrp6*<sup>-/-</sup> mice adoptively transferred with WT or *Ccr2*<sup>-/-</sup> Ly6C<sup>hi</sup> monocytes with 3.5% DSS on days 0-7. (d) Kaplan–Meyer survival curves of mice treated with 7 days of 3.5% DSS. n=5 for WT and *Nlrp6*<sup>-/-</sup> + WT Ly6C<sup>hi</sup> monocytes groups, n=8 for *Nlrp6*<sup>-/-</sup> and *Nlrp6*<sup>-/-</sup> + *Ccr2*<sup>-/-</sup> Ly6C<sup>hi</sup> monocytes groups. \*\*, p<0.01, between *Nlrp6*<sup>-/-</sup> and *Nlrp6*<sup>-/-</sup> + *Ccr2*<sup>-/-</sup> Ly6C<sup>hi</sup> monocytes groups as compared to *Nlrp6*<sup>-/-</sup> + WT Ly6C<sup>hi</sup> monocytes group.

**Supplementary Figure 3. Adoptively transferred Ly6C<sup>hi</sup> inflammatory monocytes infiltrate the lamina propria and are CX3CR1<sup>int</sup>.** (a) Age- and sex-matched *Nlrp6*<sup>-/-</sup> and

WT mice were treated 3.5% DSS for 5 days. On day 5, mice were sacrificed and composition of lamina propria cells analyzed. Representative plots of CX3CR1 expressing Ly6C<sup>hi</sup> monocytes in DSS-treated WT and *Nlrp6*<sup>-/-</sup> mice in which 97% of LP-infiltrating inflammatory monocytes are CX3CR1<sup>+</sup> in both WT and *Nlrp6*<sup>-/-</sup> mice. n=5 for each group of mice. **(b)** CX3CR1 staining of Ly6C<sup>hi</sup> inflammatory monocytes sorted from the bone marrow of *CX3CR1*<sup>gfp</sup> donor mice and adoptively transferred into *Ccr2*<sup>-/-</sup> recipient mice on day 3.5 of 3.5% DSS. **(c)** FACS analysis of LP cells isolated from DSS-treated *Ccr2*<sup>-/-</sup> recipient mice adoptively transferred with Ly6C<sup>hi</sup> *CX3CR1*<sup>gfp</sup> monocytes. CX3CR1-GFP expression in LP cells from DSS-treated *Ccr2*<sup>-/-</sup> recipient that were mock-transferred (left) or adoptively transferred with Ly6C<sup>hi</sup> *CX3CR1*<sup>gfp</sup> cells (middle). Histogram (right) showing CCR2 expression of CX3CR1-GFP<sup>-</sup> and CX3CR1-GFP<sup>+</sup> cells isolated from the designated *Ccr2*<sup>-/-</sup> recipient mice. CCR2<sup>+</sup> cells are donor-derived.

**Supplementary Figure 4. LP resident macrophages do not exhibit impaired TNF $\alpha$  production.** Resident LP macrophages (CD11b<sup>+</sup>Ly6C<sup>low/-</sup>F4/80<sup>high</sup>Ly6G<sup>-</sup>) were sorted from the LP of WT or *Nlrp6*<sup>-/-</sup> mice at day 10 of AOM/DSS as cells and gene induction was measured by qPCR. Data are representative of three independent experiments, mean  $\pm$  SEM; n=14, for both WT and *Nlrp6*<sup>-/-</sup> mice. \* - p<0.05, as compared to WT.

**Supplementary Figure 5. NLRP6<sup>-/-</sup> Ly6C<sup>hi</sup> monocytes have impaired TNF $\alpha$  production in response to DSS-induced epithelial injury.** **(a)** Induction of TNF $\alpha$  in T cells, Ly6C<sup>hi</sup> monocytes and total LP isolated from WT and *Nlrp6*<sup>-/-</sup> mice after 5 days of 3.5% DSS as measured by qPCR. **(b)** Ly6C<sup>hi</sup> monocytes from WT or *Nlrp6*<sup>-/-</sup> mice were sorted from the LP after 5 days of 3.5% DSS and production of TNF $\alpha$  and IL1 $\beta$  was measured by ELISA. **(c)** Fecal lipocalin-2 levels were measured by ELISA before and

after 5 days of 3.5% DSS. Data are presented as mean  $\pm$  SEM; n=5/genotype; statistical analysis was completed using Mann-Whitney non-parametric U test, p<0.05.

**Supplementary Figure 6. Rosiglitazone, a PPAR $\gamma$  agonist, induces NLRP6 expression and upregulates TNF $\alpha$  production in Ly6C<sup>hi</sup> inflammatory monocytes.**

Ly6C<sup>hi</sup> monocytes were sorted from BM of WT or *Nlrp6*<sup>-/-</sup> mice and stimulated with 20  $\mu$ M rosiglitazone in complete RPMI. After 24-hour incubation, RNA was isolated from cells and mRNA levels of *Nlrp6* (a) and TNF $\alpha$  (b) were measured by qPCR. Data are representative of two independent experiments, mean  $\pm$  SEM; n=8, for both WT and *Nlrp6*<sup>-/-</sup> mice. \* - p<0.05, as compared to *Nlrp6*<sup>-/-</sup> (A) or as compared to WT (B).

**Supplementary Figure 7. Recruitment of Ly6C<sup>hi</sup> monocytes into the colon lamina propria of *Nlrp6*<sup>-/-</sup> mice is not impaired during the acute inflammatory response to DSS.**

Age- and sex-matched *Nlrp6*<sup>-/-</sup> and WT mice were subjected to AOM/DSS treatment. Lamina propria cells were isolated and stained on the indicated days. (a) Representative plots of sorted cells populations. (b) Percent frequency of Ly6C<sup>hi</sup> monocytes in total LP cells (left) and absolute number of Ly6C<sup>hi</sup> monocytes (right) in the colon LP during AOM/DSS treatment. Kinetics for days 0, 10, 16 are shown. Data are representative of five independent experiments, mean  $\pm$  SEM; n=17, n=18, for WT and *Nlrp6*<sup>-/-</sup> mice respectively (day 0), n=19 for both WT and *Nlrp6*<sup>-/-</sup> mice (day 10) and n=11, for both WT and *Nlrp6*<sup>-/-</sup> mice (day 16). \*, \*\* - p<0.05, p<0.001, respectively, as compared to day 0 time point of both genotypes.

**Supplementary Figure 8. Differential expression of multiple cytokines and chemokines between WT and *Nlrp6*<sup>-/-</sup> Ly6C<sup>hi</sup> monocytes in response to AOM/DSS**

**treatment.** Ly6C<sup>hi</sup> monocytes were sorted from the lamina propria of WT and *Nlrp6*<sup>-/-</sup> mice on day 10 of AOM/DSS. RNA was extracted and hybridized to the mouse 2.1 ST array. Ratios were generated using normalized raw expression values and then log<sub>2</sub> transformed. Functional analyses of gene expression changes were performed using Ingenuity Pathways Analysis (IPA). Heat map of hierarchical clustering of the genes from cytokine/chemokine pathways based on IPA are shown. Gene chip data are from cells sorted from 4 mice/genotype.

**Supplementary Figure 9. NLRP6 deficient Ly6C<sup>hi</sup> monocytes have reduced IL18 production during the acute inflammatory response to DSS.** Ly6C<sup>hi</sup> monocytes from WT or *Nlrp6*<sup>-/-</sup> mice were sorted from the LP after 5 days of 3.5% DSS, and IL-18 levels were measured by ELISA. Data are presented as mean ± SEM; n=5/genotype.

### **Supplementary Table I. Histological Scoring System**

#### References

1. Zhan Y, Chen PJ, Sadler WD, Wang F, Poe S, Nunez G et al. Gut microbiota protects against gastrointestinal tumorigenesis caused by epithelial injury. *Cancer Res* 2013; 73(24): 7199-7210.
2. Troiani T, Martinelli E, Napolitano S, Vitagliano D, Ciuffreda LP, Costantino S et al. Increased TGF- $\alpha$  as a mechanism of acquired resistance to the anti-EGFR inhibitor cetuximab through EGFR-MET interaction and activation of MET signaling in colon cancer cells. *Clin Cancer Res* 2013; 19(24): 6751-6765.

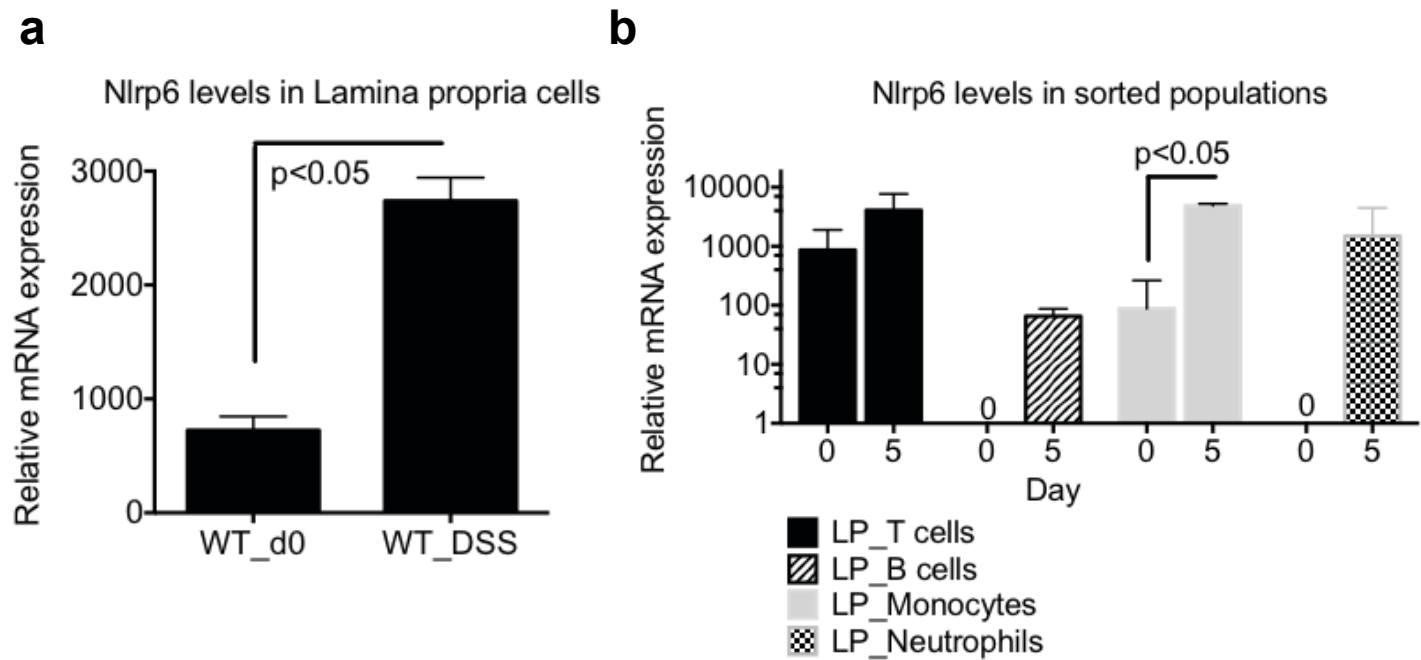

**a**

Nlrp6<sup>-/-</sup>\_DSS LP + transferred GFP<sup>+</sup> Ly6C<sup>hi</sup> monocytes

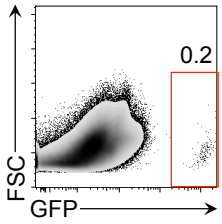

**b**

Gated on CD11b<sup>+</sup> LP cells

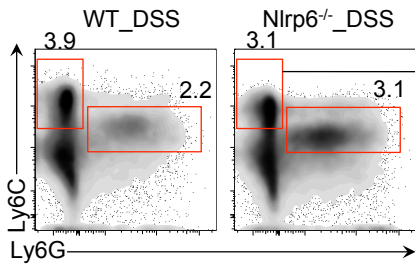

Gated on Ly6C<sup>hi</sup> LP Monocytes

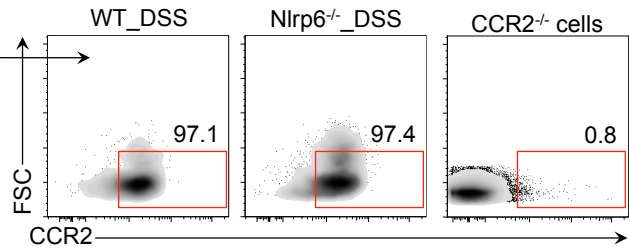

**c**

Weight change

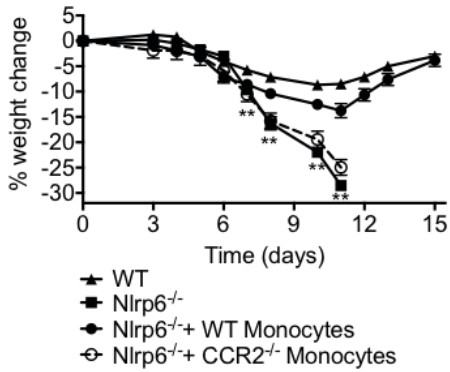

**d**

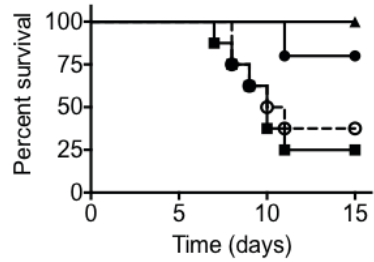

p < 0.05

- NS | ▲ WT
- NS | ● Nlrp6<sup>-/-</sup> + WT Monocytes
- NS | ■ Nlrp6<sup>-/-</sup>
- NS | ◆ Nlrp6<sup>-/-</sup> + CCR2<sup>-/-</sup> Monocytes



**a Lamina propria**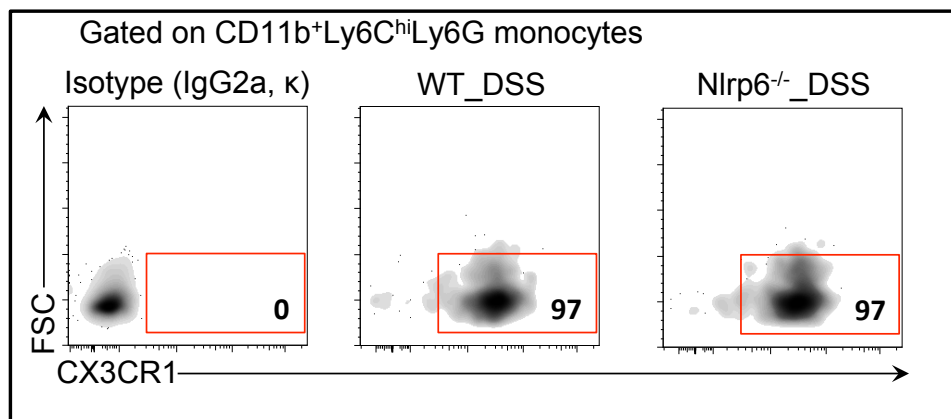**b Bone marrow**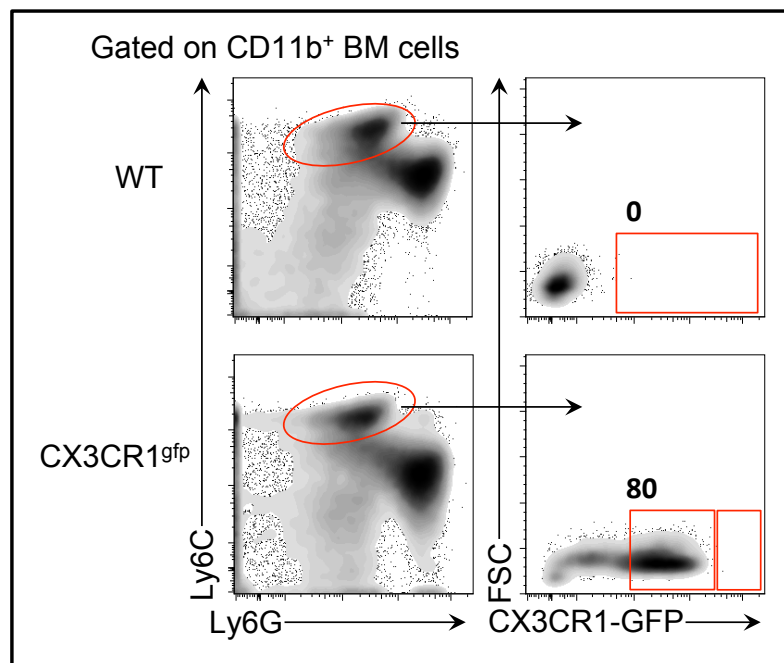**c Lamina propria**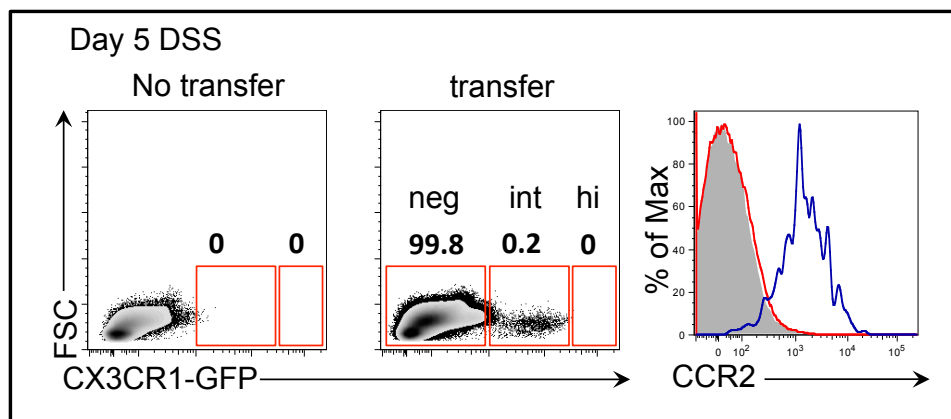

— LP cells from *Ccr2*<sup>-/-</sup> mice mock transferred

— LP cells from *Ccr2*<sup>-/-</sup> mice transferred with Ly6C<sup>hi</sup> donor cells (gated on CX3CR1-GFP<sup>-</sup>)

— LP cells from *Ccr2*<sup>-/-</sup> mice transferred with Ly6C<sup>hi</sup> donor cells (gated on CX3CR1-GFP<sup>+</sup>)

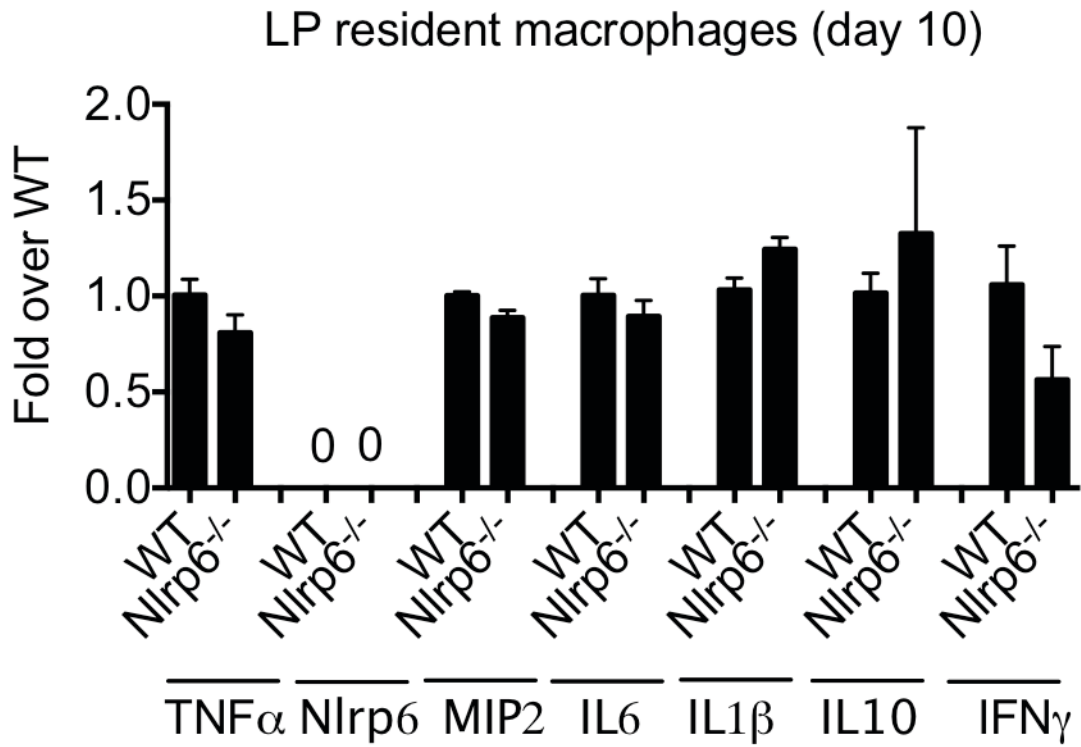

**a**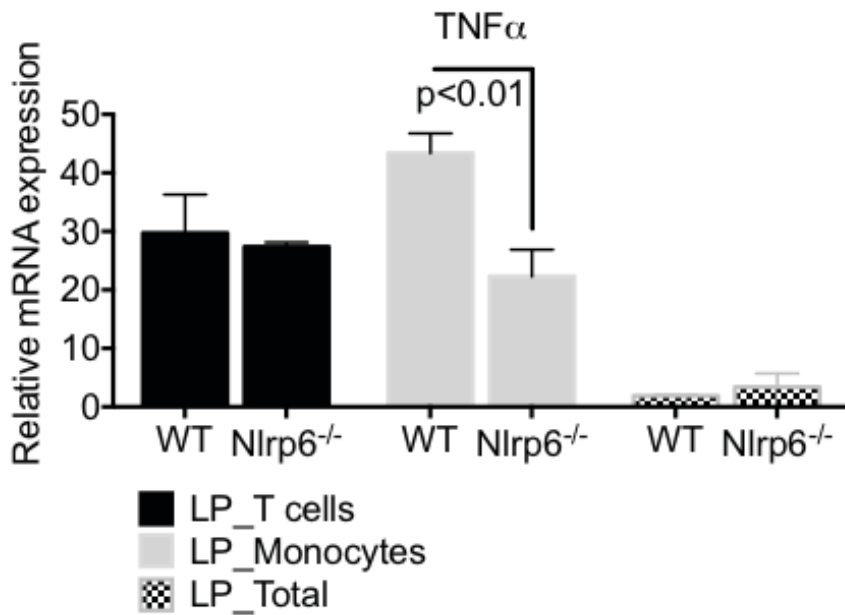**b**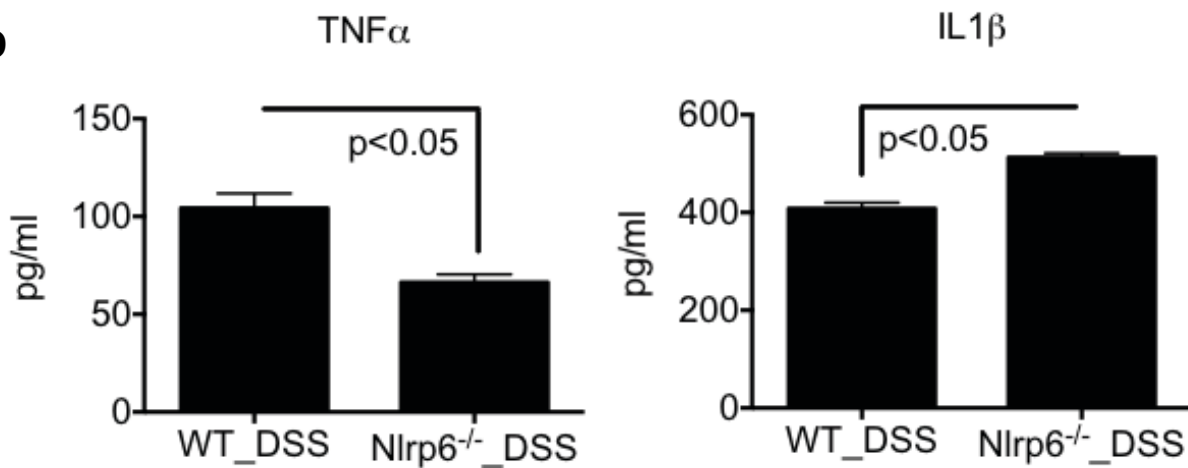**c**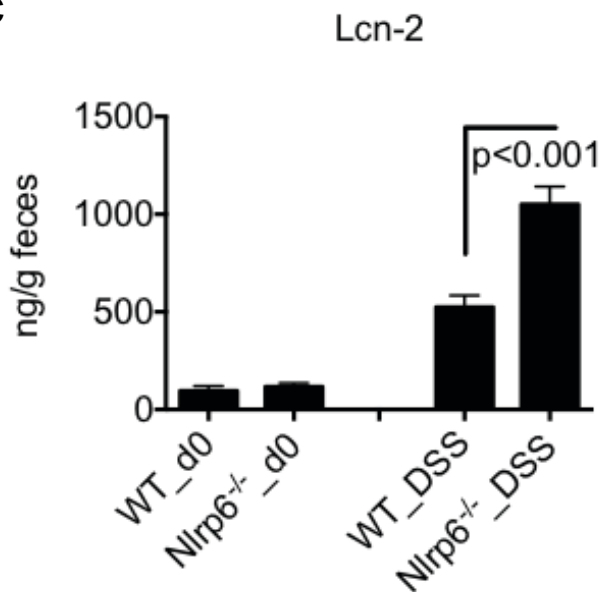

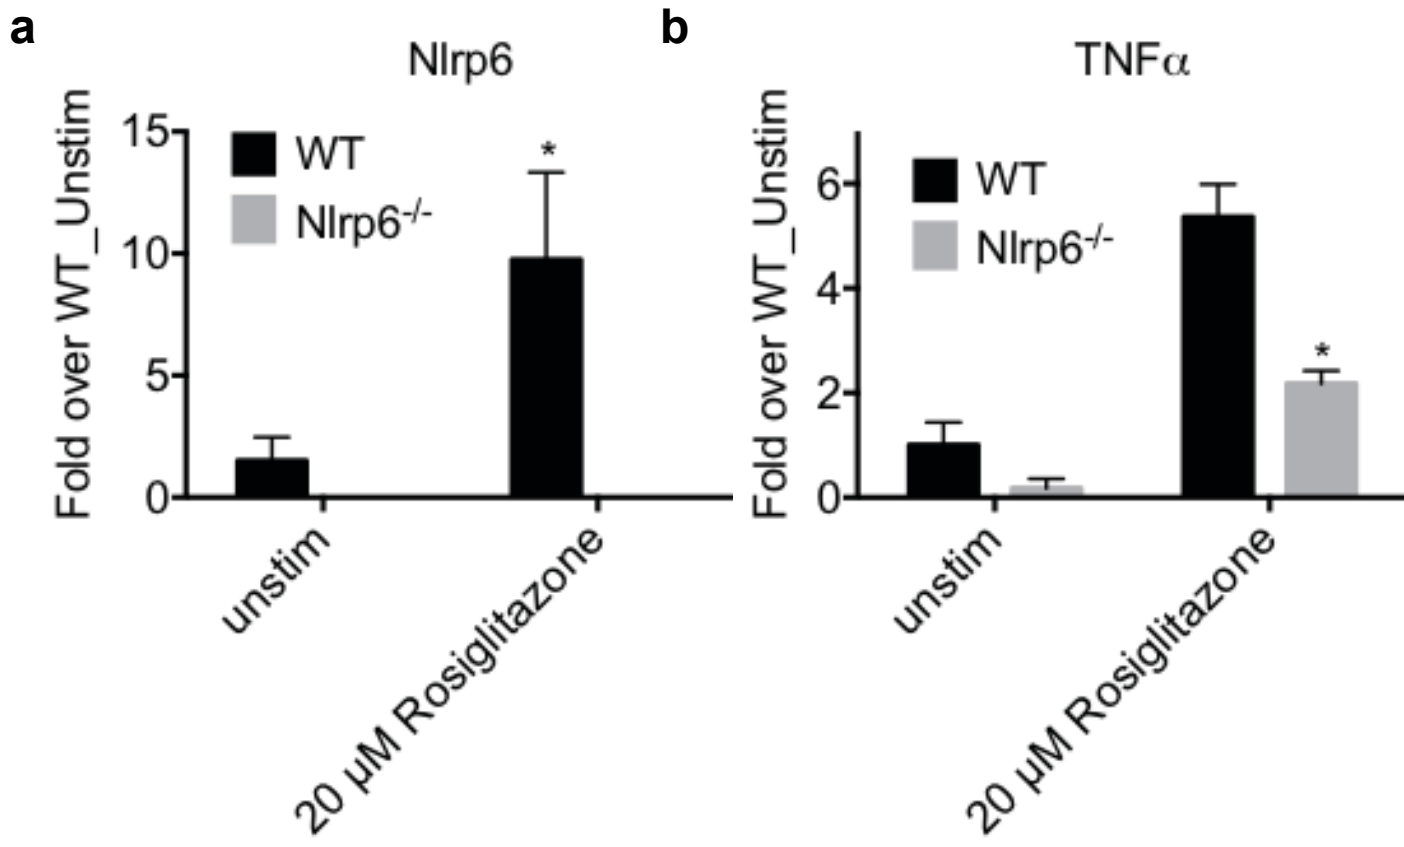

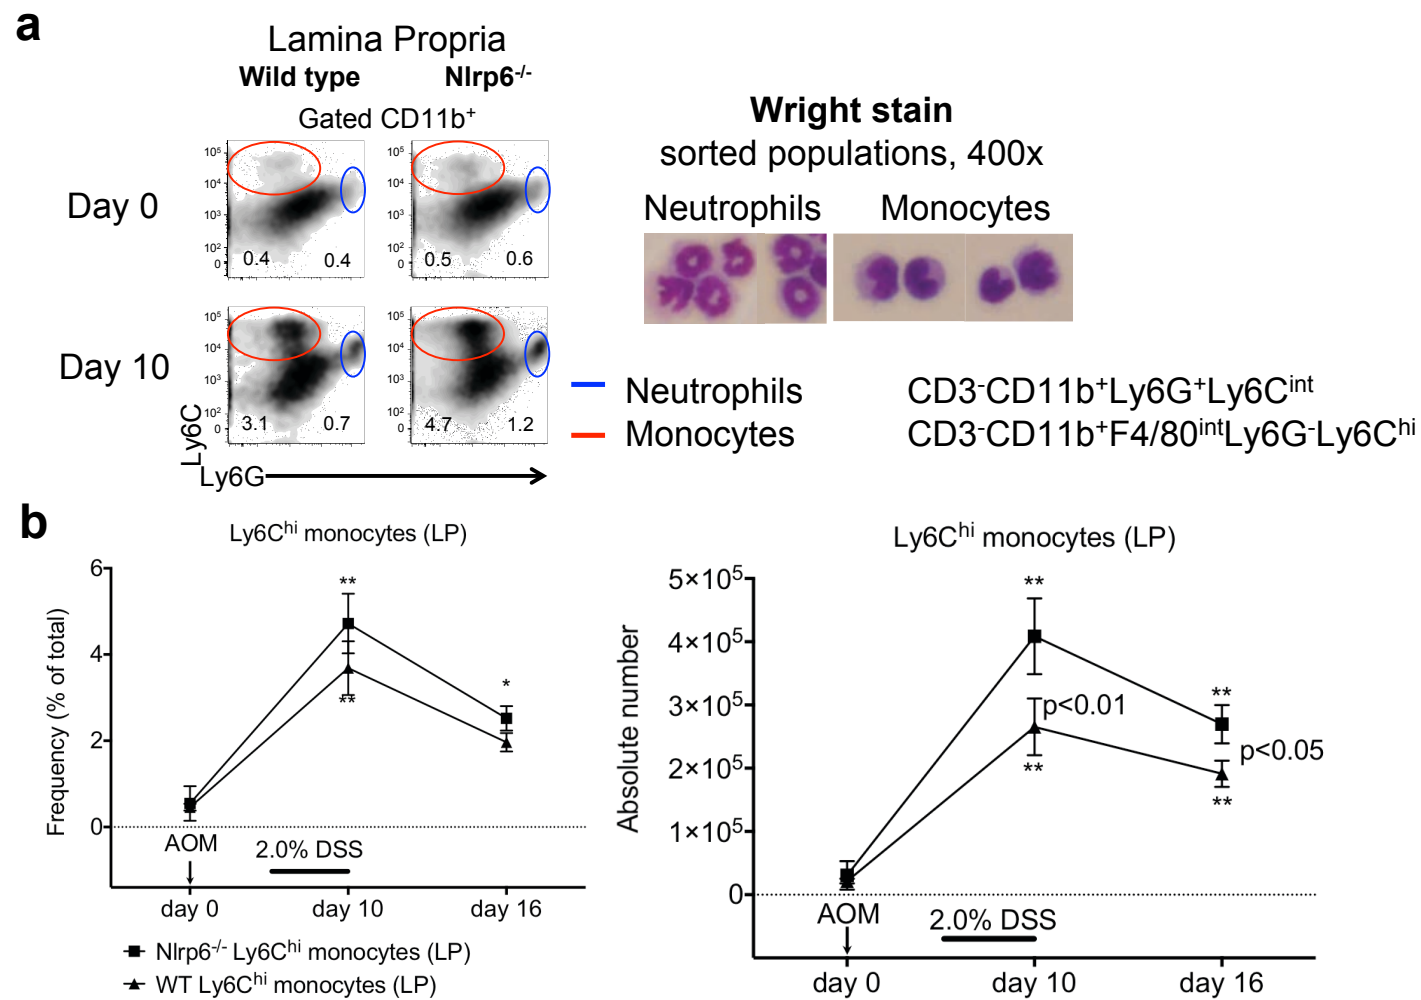

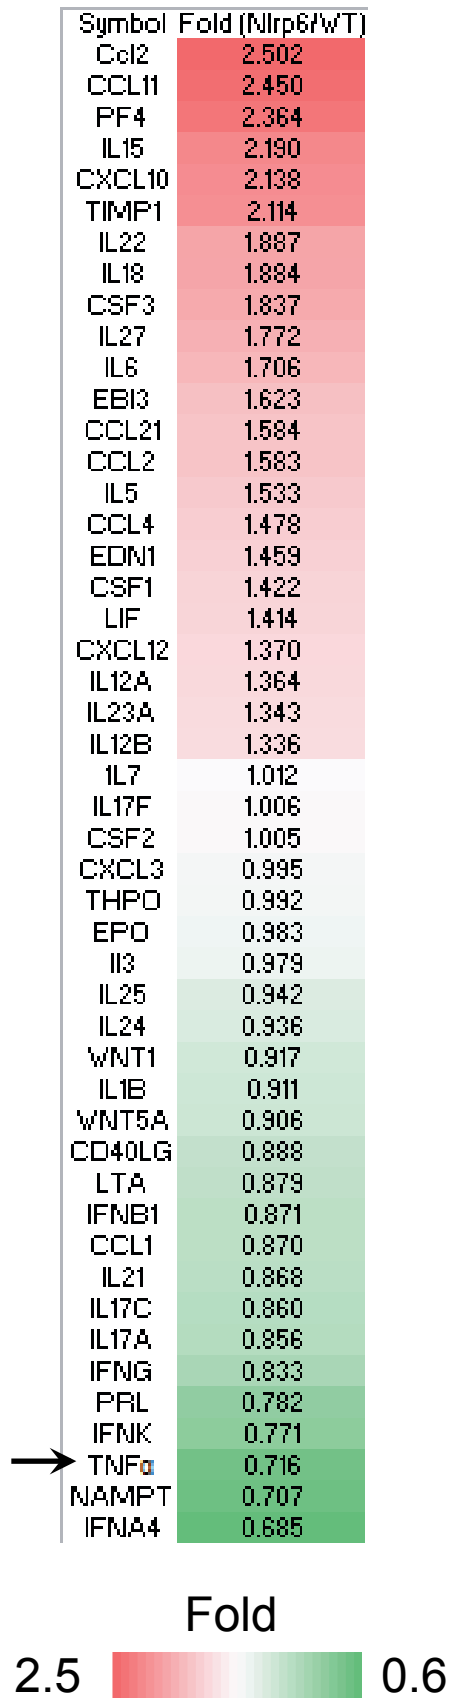

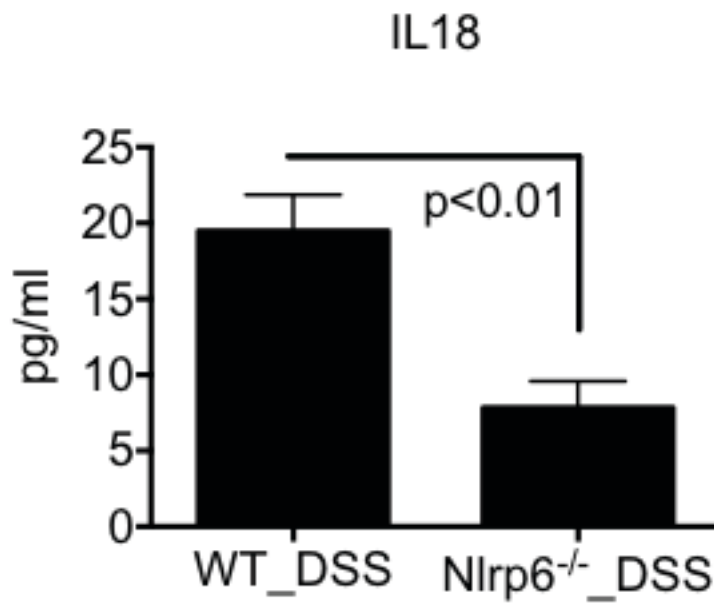

## Supplementary Table I: Histological Scoring System

| Lesion            | Score =0             | Score = 1                                                           | Score =2                                                                                             | Score =3                                                                      | Score =4                                   |
|-------------------|----------------------|---------------------------------------------------------------------|------------------------------------------------------------------------------------------------------|-------------------------------------------------------------------------------|--------------------------------------------|
| Inflammation      | No inflammation      | mild infiltration of neutrophils confined to the lamina propria     | moderate infiltration of neutrophils or mixed inflammatory cells in the lamina propria and submucosa | Severe, mixed inflammation extend through the lamina propria and submucosa    | Severe, transmural inflammatory infiltrate |
| Epithelial damage | Within normal limits | Occasional dilated glands and/or single cell necrosis within glands | Widespread gland loss                                                                                | Surface epithelial erosion with loss of glands and collapse of lamina propria | Ulceration                                 |
| Hyperplasia       | No hyperplasia       | Minimal proliferation                                               | Prominent proliferation, focally severe or throughout the field                                      | Dysplasia                                                                     | Adenoma                                    |
